# Supplementary material for: Ab Initio Study of Structural, Electronic and Magnetic Properties of TM&(B@C60) (TM = V, Cr) Sandwich Clusters and Infinite Molecular Wires
Source: MDPI journal article supplement (doi:10.3390/nano12162770), 2022-08-12
Supplement: s1 [file s1]

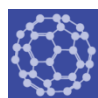

Supporting Information

# Ab Initio Study of Structural, Electronic and Magnetic Properties of TM&(B@C<sub>60</sub>) (TM = V, Cr) Sandwich Clusters and Infinite Molecular Wires

Jie Ji <sup>1</sup>, Tianxia Guo <sup>1</sup>, Liyan Qian <sup>1</sup>, Xiaokang Xu <sup>1</sup>, Huanning Yang <sup>1</sup>, Yue Xie <sup>1</sup>, Maoshuai He <sup>2</sup>, Xiaojing Yao <sup>3,\*</sup>,  
Xiuyun Zhang <sup>1,\*</sup> and Yongjun Liu <sup>1,\*</sup>

<sup>1</sup> College of Physics Science and Technology, Yangzhou University, Yangzhou 225002, China

<sup>2</sup> College of Chemistry and Molecular Engineering, Qingdao University of Science and Technology, Qingdao 266042, China

<sup>3</sup> College of Physics and Hebei Advanced Thin Film Laboratory, Hebei Normal University, Shijiazhuang 050024, China

\* Correspondence: xiyao@hebtu.edu.cn (X.Y.); xyzhang@yzu.edu.cn (X.Z.); yjliu@yzu.edu.cn (Y.L.)

**Table S1.** Different spin states for each system,  $\Delta E_1$  is the energy difference between the different states and the magnetic ground states.

| sys                                           | MM( $\mu_B$ ) | $\Delta E_1$ (eV) | sys                                                         | MM( $\mu_B$ ) | $\Delta E_1$ (eV) |
|-----------------------------------------------|---------------|-------------------|-------------------------------------------------------------|---------------|-------------------|
| V&(B@C <sub>60</sub> ) <sub>2</sub> $\eta^5$  | 1.00          | 0.94              | [V&(B@C <sub>60</sub> ) <sub>2</sub> $\eta^5$ ] $_{\infty}$ | 4.00          | 0.07              |
|                                               | 3.00          | 0.00              |                                                             | 6.00          | 0.00              |
|                                               | 5.00          | 0.01              |                                                             | 8.00          | 1.35              |
| V&(B@C <sub>60</sub> ) <sub>2</sub> $\eta^6$  | 1.00          | 0.00              | [V&(B@C <sub>60</sub> ) <sub>2</sub> $\eta^6$ ] $_{\infty}$ | 2.00          | 0.00              |
|                                               | 3.00          | 0.03              |                                                             | 4.00          | 0.07              |
|                                               | 4.00          | 0.03              |                                                             | 5.00          | 0.01              |
| Cr&(B@C <sub>60</sub> ) <sub>2</sub> $\eta^5$ | 6.00          | 0.00              | [Cr&(B@C <sub>60</sub> ) $\eta^5$ ] $_{\infty}$             | 7.00          | 0.00              |
|                                               | 8.00          | 0.41              |                                                             | 9.00          | 1.38              |
|                                               | 2.00          | 0.00              |                                                             | 1.00          | 2.74              |
| Cr&(B@C <sub>60</sub> ) <sub>2</sub> $\eta^6$ | 4.00          | 0.17              | [Cr&(B@C <sub>60</sub> ) $\eta^6$ ] $_{\infty}$             | 3.00          | 0.00              |
|                                               |               |                   |                                                             | 5.00          | 1.01              |

**Table S2.** The energy difference between FM and AFM states ( $\Delta E_2 = E_{FM} - E_{AFM}$ , eV).

| sys                                                         | coupling | $\Delta E_2$ |
|-------------------------------------------------------------|----------|--------------|
| [V&(B@C <sub>60</sub> ) <sub>2</sub> $\eta^6$ ] $_{\infty}$ | AFM      | 0.35         |
| [Cr&(B@C <sub>60</sub> ) $\eta^5$ ] $_{\infty}$             | FM       | -0.1         |

## Atomic coordination of V&(B@C<sub>60</sub>)<sub>2</sub> $\eta^5$

V&(B@C<sub>60</sub>)<sub>2</sub> $\eta^5$

1.0000000000000000

20.0000000000000000 0.0000000000000000 0.0000000000000000

0.0000000000000000 26.0000000000000000 0.0000000000000000

0.0000000000000000 0.0000000000000000 20.0000000000000000

B C V

2 120 1

Direct

0.4995368986640565 0.7110652753452844 0.4998032600672940

0.4997308534484114 0.2987454813609195 0.4914072190609476

|                    |                    |                    |
|--------------------|--------------------|--------------------|
| 0.6087588711790616 | 0.6324409376893598 | 0.3934222647985906 |
| 0.6522771405640693 | 0.6326726665433668 | 0.5025650509623536 |
| 0.6217642179741841 | 0.7256933535965313 | 0.3745402634588674 |
| 0.5492631928843460 | 0.6322573360299990 | 0.3556789687552079 |
| 0.5397356994579816 | 0.5753747794107804 | 0.5479015055919653 |
| 0.5784371784653027 | 0.6033459346351101 | 0.5944387830750055 |
| 0.6373875733462792 | 0.6802999541028311 | 0.6085924615610644 |
| 0.6567701343234386 | 0.7260297564527968 | 0.5773210249433467 |
| 0.4919713107889727 | 0.6030067520310273 | 0.3777540634388939 |
| 0.4321531289464632 | 0.6322376479163220 | 0.3634396565333256 |
| 0.4523621506254523 | 0.6797490339667781 | 0.3312567953638573 |
| 0.5448760971437393 | 0.6327131903251033 | 0.6457978905808972 |
| 0.5815735596876970 | 0.6803251324748191 | 0.6549808195006481 |
| 0.6214081453553172 | 0.7734160784554670 | 0.5913415861240586 |
| 0.3870869942548337 | 0.8022260431436786 | 0.5445242219656251 |
| 0.3544362459585322 | 0.7256925927001299 | 0.5969076190466347 |
| 0.3645837171530388 | 0.7729854808149742 | 0.4290179318914535 |
| 0.4423404499423976 | 0.8304649776276347 | 0.5224150565831714 |
| 0.4748050981866904 | 0.7260264550984211 | 0.6731916915425185 |
| 0.4392833108343175 | 0.6802055824543901 | 0.6641544705837933 |
| 0.3752574988644257 | 0.6324267803301180 | 0.5876594426549582 |
| 0.3490610950861650 | 0.6322790407387743 | 0.5222287143739150 |
| 0.5036763522765990 | 0.8305921688838729 | 0.5612385566845437 |
| 0.5594350502110330 | 0.8305860800432421 | 0.5148361746698535 |
| 0.5325032739808451 | 0.8304605537836225 | 0.4474235407425722 |
| 0.4746480349836526 | 0.6327130296888768 | 0.6502707470806530 |
| 0.4347091570957882 | 0.6033298260597669 | 0.6036324891117342 |
| 0.3812617897819299 | 0.6030574358935834 | 0.4699171797923712 |
| 0.3911741552983856 | 0.7731179235279274 | 0.6062801853447355 |
| 0.3476022058618741 | 0.7729154111237071 | 0.4970492394945414 |
| 0.3778640493518420 | 0.6800151753472221 | 0.6254009115164987 |
| 0.4503778271808086 | 0.7733643276322900 | 0.6439314822148330 |
| 0.4600990434702414 | 0.8304041600038199 | 0.4520602929114420 |

|                    |                    |                    |
|--------------------|--------------------|--------------------|
| 0.4219030388464905 | 0.8022864755977981 | 0.4061309708213294 |
| 0.3622370815728692 | 0.7255100051680150 | 0.3912217668287501 |
| 0.3427557733684284 | 0.6797660028306625 | 0.4224465981116332 |
| 0.5076614534039654 | 0.8026404205890323 | 0.6209333452814300 |
| 0.5675792608442000 | 0.7734622504166259 | 0.6362165002989895 |
| 0.5473389948311995 | 0.7260666049654882 | 0.6684169414980454 |
| 0.4548792396359329 | 0.7729637527223988 | 0.3539766255247277 |
| 0.4181410803796189 | 0.7254951160987009 | 0.3447638471092679 |
| 0.3781020825942434 | 0.6322663807179054 | 0.4084670679294890 |
| 0.6136581977835213 | 0.6033313919632458 | 0.4547907382842422 |
| 0.6454232910789544 | 0.6800106036801057 | 0.4028423256978153 |
| 0.6350948988204163 | 0.6326716282528148 | 0.5708390166570902 |
| 0.5576158555355198 | 0.5753383355148971 | 0.4772402277637293 |
| 0.5247959896800355 | 0.6797473876054596 | 0.3264939406176801 |
| 0.5602579718093870 | 0.7255392047372446 | 0.3357324574600187 |
| 0.6242948497464568 | 0.7731341022923298 | 0.4123365583591177 |
| 0.6504140367017797 | 0.7733145727179334 | 0.4774716878403291 |
| 0.4959801526229819 | 0.5752459156852497 | 0.4382647785114723 |
| 0.4399709674341615 | 0.5752587669615029 | 0.4848648878232633 |
| 0.4670104799684550 | 0.5753499789025291 | 0.5525914336889323 |
| 0.5248415609379452 | 0.7729086662227573 | 0.3496375607270665 |
| 0.5643228981479459 | 0.8022444105057518 | 0.3970866876043528 |
| 0.6173323937601495 | 0.8025769428740690 | 0.5296174303239464 |
| 0.6723517433432836 | 0.6801631904040724 | 0.4702990847370697 |
| 0.6747168010119330 | 0.7259857283741494 | 0.5068661538072758 |
| 0.3274695091223467 | 0.7255572866033307 | 0.5293584347216366 |
| 0.3248379666121058 | 0.6797614640617716 | 0.4928125689516070 |
| 0.6089240568530793 | 0.2265993281256986 | 0.3939189344360641 |
| 0.6524319955396222 | 0.2268038049990173 | 0.5029242758704910 |
| 0.6222134633256514 | 0.3198263944584279 | 0.3748107647076825 |
| 0.5497008999273465 | 0.2264537993066476 | 0.3564808880979255 |
| 0.5398300197798891 | 0.1691374462339396 | 0.5479681160840545 |
| 0.5778021446045367 | 0.1975891175667442 | 0.5936500766804504 |

|                    |                    |                    |
|--------------------|--------------------|--------------------|
| 0.6374990311850017 | 0.2743979390579449 | 0.6086045203626494 |
| 0.6571963919265250 | 0.3201686317472037 | 0.5775688674598640 |
| 0.4924255416846455 | 0.1971211841491988 | 0.3794733897700725 |
| 0.4325620718776853 | 0.2263400479771373 | 0.3641244835595989 |
| 0.4527878148004653 | 0.2737591713723266 | 0.3319658729172167 |
| 0.5448896529647285 | 0.2269111292184281 | 0.6458557240588491 |
| 0.5816097742087130 | 0.2743907873490178 | 0.6550770077395435 |
| 0.6218931435711827 | 0.3677052751151788 | 0.5915971553623121 |
| 0.3863454606371977 | 0.3966400554995649 | 0.5453624757984881 |
| 0.3544957722916169 | 0.3198278067358974 | 0.5973462763819812 |
| 0.3650679939773649 | 0.3671817376987128 | 0.4295189351874060 |
| 0.4423684998634796 | 0.4247696557199332 | 0.5229374686006659 |
| 0.4750808426361201 | 0.3200762892347283 | 0.6735211325543581 |
| 0.4396180991524612 | 0.2742275437598827 | 0.6643974641345284 |
| 0.3757341486580129 | 0.2266180275858010 | 0.5877865970394088 |
| 0.3497560676353508 | 0.2264837985275415 | 0.5227220945652666 |
| 0.5039885579470135 | 0.4248240412448272 | 0.5618270416718666 |
| 0.5600449206701971 | 0.4248619916447239 | 0.5152332214004898 |
| 0.5330685840933337 | 0.4248372469346512 | 0.4475452028637883 |
| 0.4749832396955271 | 0.2268271646666609 | 0.6504459821138635 |
| 0.4356465385848167 | 0.1974228952690515 | 0.6029697396030749 |
| 0.3828707931555155 | 0.1971727871732966 | 0.4706248651190518 |
| 0.3912081021830158 | 0.3674255185422811 | 0.6066638098668353 |
| 0.3477091249333875 | 0.3672544798856263 | 0.4977064786825158 |
| 0.3781745282629437 | 0.2741067669938251 | 0.6255744585457603 |
| 0.4506720662131479 | 0.3675434258369973 | 0.6442538907974090 |
| 0.4603429024480896 | 0.4247665320899690 | 0.4522983742492289 |
| 0.4218224526265965 | 0.3964990144630818 | 0.4060025845810825 |
| 0.3627692924446916 | 0.3195718659913765 | 0.3917533353498355 |
| 0.3433724886963042 | 0.2737771532716081 | 0.4229627234006519 |
| 0.5080008900564572 | 0.3968444475732166 | 0.6221203660187037 |
| 0.5677790931447098 | 0.3676981767626712 | 0.6366151472989486 |
| 0.5475178641291942 | 0.3201653101649581 | 0.6687691428941135 |

|                    |                    |                    |
|--------------------|--------------------|--------------------|
| 0.4552880763579544 | 0.3671894787708915 | 0.3545027961238604 |
| 0.4185938058549783 | 0.3195678342876582 | 0.3453633431046327 |
| 0.3787176933242196 | 0.2263702741445585 | 0.4089725908952250 |
| 0.6129415180250611 | 0.1973919688179910 | 0.4555797237719449 |
| 0.6456447725960258 | 0.2740869115929155 | 0.4032281558479054 |
| 0.6351312926238519 | 0.2269119321343429 | 0.5708084878501745 |
| 0.5577129484101772 | 0.1690417339306559 | 0.4776676207410086 |
| 0.5253196178974487 | 0.2738338606674159 | 0.3272222229694324 |
| 0.5608479971879290 | 0.3197013805998090 | 0.3360672343629925 |
| 0.6247095545428303 | 0.3674474984577801 | 0.4125523455604155 |
| 0.6508342143096192 | 0.3675618736317785 | 0.4778801394507252 |
| 0.4963684269896700 | 0.1689198543263255 | 0.4389375047901096 |
| 0.4405846241646731 | 0.1689373588802221 | 0.4853244719036076 |
| 0.4674389869409979 | 0.1690618246568829 | 0.5527025101823712 |
| 0.5255140448368983 | 0.3672694555831167 | 0.3499085228807791 |
| 0.5653090825623228 | 0.3966563781104888 | 0.3965798962744333 |
| 0.6185929068421843 | 0.3968673166918899 | 0.5301944797872408 |
| 0.6726101230722207 | 0.2742072326451073 | 0.4707084555165688 |
| 0.6751077981760900 | 0.3200756593294278 | 0.5072232510542509 |
| 0.3275998041371989 | 0.3197104546708583 | 0.5299370433112719 |
| 0.3254248721557390 | 0.2738547665134217 | 0.4933949308113167 |
| 0.5000065114340706 | 0.5000711534071192 | 0.5000821828654587 |

#### Atomic coordination of V(B@C<sub>60</sub>)<sub>2</sub>η<sup>6</sup>

V(B@C<sub>60</sub>)<sub>2</sub>η<sup>6</sup>

1.0000000000000000

20.0000000000000000 0.0000000000000000 0.0000000000000000

0.0000000000000000 20.0000000000000000 0.0000000000000000

0.0000000000000000 0.0000000000000000 26.0000000000000000

C B V

120 2 1

Selective dynamics

Direct

|                    |                    |                    |
|--------------------|--------------------|--------------------|
| 0.3454967786866974 | 0.4635154847639805 | 0.6293515993069613 |
| 0.3330825474416051 | 0.5589689410896059 | 0.6814933529926724 |
| 0.3653443783559263 | 0.3844428939752933 | 0.7009288567170793 |
| 0.3901931877919189 | 0.4278573494036297 | 0.5983854515345729 |
| 0.4247234442303947 | 0.6307595004166585 | 0.6183910576353113 |
| 0.4123296267335322 | 0.6522678853133559 | 0.6688216932345004 |
| 0.3915657554037509 | 0.6154892606717878 | 0.7530089257624766 |
| 0.3839554678138447 | 0.5588512852499228 | 0.7840873387703187 |
| 0.4376015016967082 | 0.4644630233144322 | 0.5667085700120522 |
| 0.5003709417001936 | 0.4281672798058495 | 0.5667102723458920 |
| 0.4922493536546545 | 0.3688222125323691 | 0.5983769782333044 |
| 0.4673581508071205 | 0.6744092366895336 | 0.7009274023028731 |
| 0.4545743291845616 | 0.6517746734712907 | 0.7529957196260317 |
| 0.4387017142850040 | 0.5363229288691124 | 0.8163726201548686 |
| 0.6542900245050400 | 0.4634883541541127 | 0.7529643178583727 |
| 0.6675959626894640 | 0.5585675105781902 | 0.7008891049411683 |
| 0.6344040999103049 | 0.3846358358391835 | 0.6814342012357447 |
| 0.6089821162953837 | 0.4286588265997482 | 0.7840559921461699 |
| 0.5751616485570681 | 0.6297762186893343 | 0.7640009194180385 |
| 0.5876162679032885 | 0.6512952797096615 | 0.7136910562164686 |
| 0.6091668271052637 | 0.6154214799942407 | 0.6293085578051194 |
| 0.6175938624699063 | 0.5588566017282265 | 0.5983378203526944 |
| 0.5621628501017444 | 0.4648750980720059 | 0.8163593489551142 |
| 0.4993032348359814 | 0.4286591900765264 | 0.8163793751063515 |
| 0.5071419920292787 | 0.3699795818614262 | 0.7840753974116457 |
| 0.5328064014781602 | 0.6740253426191199 | 0.6814706954195739 |
| 0.5457623877035210 | 0.6520999631690485 | 0.6293287456055181 |
| 0.5621233462099049 | 0.5361956615949497 | 0.5666725233804876 |
| 0.6543479829379735 | 0.5362133548309896 | 0.7529656802377166 |
| 0.6674708019576632 | 0.4411099262629899 | 0.7008814756630593 |
| 0.6346306427668678 | 0.6151248341919731 | 0.6814457570126150 |
| 0.6091092048078496 | 0.5711021655023953 | 0.7840417430982793 |
| 0.5749291322120369 | 0.3700496337567708 | 0.7640073214515410 |

|                    |                    |                    |
|--------------------|--------------------|--------------------|
| 0.5873285846761760 | 0.3485264644646301 | 0.7136750931806141 |
| 0.6089179055697070 | 0.3843865081546891 | 0.6293108879715530 |
| 0.6174645285576293 | 0.4409392882207607 | 0.5983415801756807 |
| 0.5622234262643003 | 0.5349775643444843 | 0.8163456966926061 |
| 0.4994268665102037 | 0.5712938806358904 | 0.8163514066116579 |
| 0.5073924498046899 | 0.6299493121260580 | 0.7840581118576780 |
| 0.5324738594999675 | 0.3259168917924947 | 0.6814503575722061 |
| 0.5454642351824361 | 0.3478470548007352 | 0.6293250739483545 |
| 0.5620366899737191 | 0.4636845285284575 | 0.5666934305008295 |
| 0.3455587492523721 | 0.5367602127450608 | 0.6293573561309083 |
| 0.3329625848316665 | 0.4413374080086989 | 0.6814841156516592 |
| 0.3655736782019484 | 0.6157763691015355 | 0.7009394475478458 |
| 0.3903226091441400 | 0.5723576263083638 | 0.5983804553910953 |
| 0.4244857685657346 | 0.3693894010457723 | 0.6183898322972371 |
| 0.4120432455860680 | 0.3478978787638022 | 0.6688016639032645 |
| 0.3913160235770318 | 0.3846788159163487 | 0.7530149541874219 |
| 0.3838299880496602 | 0.4413212423055268 | 0.7840916607927927 |
| 0.4376663704078392 | 0.5356529395896599 | 0.5667108436865003 |
| 0.5004978739530922 | 0.5718483276740640 | 0.5666922803788758 |
| 0.4924973543190062 | 0.6312239286670088 | 0.5983684540234786 |
| 0.4670222233348925 | 0.3256344289527691 | 0.7009088617777950 |
| 0.4542762880701434 | 0.3482540527286155 | 0.7530001769560420 |
| 0.4386150956830374 | 0.4637678722947406 | 0.8163873067674678 |
| 0.3252486885786676 | 0.5001532050846776 | 0.7137267464507051 |
| 0.3501010859431722 | 0.5001334646455788 | 0.7640392286898294 |
| 0.6757992999648278 | 0.4998363308475894 | 0.6687604544715661 |
| 0.6509741379641946 | 0.4998551255429914 | 0.6183485321359933 |
| 0.3455647134949297 | 0.4637262718072243 | 0.2470075350305917 |
| 0.3324568434131677 | 0.5589215329788532 | 0.2990718397657369 |
| 0.3652367559266965 | 0.3846617042504543 | 0.3184793282955516 |
| 0.3908469295684808 | 0.4287956352444495 | 0.2159787471524534 |
| 0.4251396694413878 | 0.6299359696481299 | 0.2360589011432277 |
| 0.4126830954695678 | 0.6515803388905406 | 0.2863076443757763 |

|                    |                    |                    |
|--------------------|--------------------|--------------------|
| 0.3910801467498799 | 0.6157413912723251 | 0.3705783635870433 |
| 0.3825470513234233 | 0.5590951274707268 | 0.4014532743708776 |
| 0.4377541715778793 | 0.4649726575561174 | 0.1837067896917966 |
| 0.5005575364850001 | 0.4286316196310024 | 0.1837093672125622 |
| 0.4925922459126776 | 0.3699487615611421 | 0.2159925554841895 |
| 0.4675945933414107 | 0.6741853165893384 | 0.3184662963515705 |
| 0.4545600283689248 | 0.6523149496026414 | 0.3705786747232198 |
| 0.4380311283064742 | 0.5363217741622158 | 0.4330656062324715 |
| 0.6545441587755932 | 0.4632504350103983 | 0.3705462699675297 |
| 0.6671462260388964 | 0.5587664585355567 | 0.3184338263670319 |
| 0.6345089485147299 | 0.3841138978893442 | 0.2990258141636203 |
| 0.6097162242332338 | 0.4276125389564622 | 0.4014416856439471 |
| 0.5755961687260746 | 0.6307298472399158 | 0.3814879485551304 |
| 0.5880639936012746 | 0.6522723035154568 | 0.3311183935484893 |
| 0.6087733773556576 | 0.6154938144024574 | 0.2469878149778671 |
| 0.6161799057976576 | 0.5587183768449906 | 0.2160101053127028 |
| 0.5623294029425934 | 0.4643773052995109 | 0.4330526147996200 |
| 0.4994969112768238 | 0.4281522381418758 | 0.4330236066866634 |
| 0.5074522687675606 | 0.3687318613519901 | 0.4013946513038202 |
| 0.5330418079791276 | 0.6744753225867031 | 0.2990606866179854 |
| 0.5458266157026006 | 0.6518797771400749 | 0.2470083423258531 |
| 0.5613748551067493 | 0.5362339116571514 | 0.1837453695314336 |
| 0.6546321838575923 | 0.5365421811957971 | 0.3705572964298622 |
| 0.6670510126145102 | 0.4409915986283264 | 0.3184276524511926 |
| 0.6347776750376309 | 0.6156968913159288 | 0.2990382244048531 |
| 0.6099272714665441 | 0.5722748001917872 | 0.4014931794861260 |
| 0.5752377586561784 | 0.3692337822180396 | 0.3814356350403135 |
| 0.5876923468788599 | 0.3476307926802801 | 0.3310836517429964 |
| 0.6084763658796952 | 0.3843899502526261 | 0.2469782001925843 |
| 0.6160552367377260 | 0.4411070161805176 | 0.2159921755436696 |
| 0.5624456783629788 | 0.5355716989109052 | 0.4330932147794306 |
| 0.4996736735512414 | 0.5718975702669482 | 0.4331007736199913 |
| 0.5078078685702080 | 0.6313322433125220 | 0.4014766533038033 |



|                    |                    |                    |
|--------------------|--------------------|--------------------|
| 0.5325868128476053 | 0.3255325367078410 | 0.2990523508404039 |
| 0.5454291463724935 | 0.3481159523846501 | 0.2470012684491759 |
| 0.5612851618126523 | 0.4636581321472718 | 0.1837294390701509 |
| 0.3456359427678171 | 0.5364879621520502 | 0.2470070940267812 |
| 0.3323624580282049 | 0.4413081224037868 | 0.2990743290404393 |
| 0.3655291102011842 | 0.6155032080108073 | 0.3184746699166596 |
| 0.3910271254877774 | 0.5713381040161072 | 0.2160124010222738 |
| 0.4248105563395039 | 0.3701311411582143 | 0.2360361398394292 |
| 0.4123131310157003 | 0.3485282155659183 | 0.2862833888734279 |
| 0.3907372436960646 | 0.3843208046083009 | 0.3705894526210257 |
| 0.3824172499488319 | 0.4410483479482449 | 0.4014379082066910 |
| 0.4378547694909665 | 0.5350914031487924 | 0.1837331177459660 |
| 0.5007263146534037 | 0.5713331586548235 | 0.1837543473612299 |
| 0.4929196841109314 | 0.6300246776183251 | 0.2160461659860586 |
| 0.4671383848989112 | 0.3258070430484483 | 0.3184641943122766 |
| 0.4541274824150119 | 0.3476721107426350 | 0.3705727026276050 |
| 0.4379326035143261 | 0.4637748413116592 | 0.4330330210026723 |
| 0.3240942713675395 | 0.5001269583928317 | 0.3311217396673029 |
| 0.3490451782846248 | 0.5000996473177809 | 0.3814982754150163 |
| 0.6749030088178706 | 0.4998677333105197 | 0.2862557114315408 |
| 0.6499214371984368 | 0.4998860344701603 | 0.2359958294812865 |
| 0.5003095099518479 | 0.4995973729106169 | 0.6900297705156480 |
| 0.4987114955393736 | 0.5006037524414246 | 0.3132719896203951 |
| 0.5000335717837068 | 0.5000275505827960 | 0.5000382132814487 |

#### Atomic coordination of Cr&(B@C<sub>60</sub>)<sub>2</sub>\_ $\eta^5$

Cr&(B@C<sub>60</sub>)<sub>2</sub>\_ $\eta^5$

1.0000000000000000

|                     |                     |                    |
|---------------------|---------------------|--------------------|
| 20.0000000000000000 | 0.0000000000000000  | 0.0000000000000000 |
| 0.0000000000000000  | 26.0000000000000000 | 0.0000000000000000 |

| 0.000000000000000000 0.000000000000000000 20.000000000000000000 |                    |                    |
|-----------------------------------------------------------------|--------------------|--------------------|
| B                                                               | C                  | Cr                 |
| 2                                                               | 120                | 1                  |
| Selective dynamics                                              |                    |                    |
| Direct                                                          |                    |                    |
| 0.4973879419741890                                              | 0.7016985931967843 | 0.5010642324618884 |
| 0.4985961067382378                                              | 0.2983190239647975 | 0.4988514257790194 |
| 0.6089623443800941                                              | 0.6338661154563089 | 0.3932452019337418 |
| 0.6525941212566173                                              | 0.6341711169639414 | 0.5023585756905536 |
| 0.6217720497695373                                              | 0.7271882229180525 | 0.3743025366069700 |
| 0.5494221549397684                                              | 0.6336922053858746 | 0.3557364434900900 |
| 0.5398585056480505                                              | 0.5771282968343768 | 0.5477976241945604 |
| 0.5785311521199381                                              | 0.6049760291869408 | 0.5942137143306824 |
| 0.6375080906945451                                              | 0.6818904239957967 | 0.6082397250222589 |
| 0.6567830879283921                                              | 0.7276906213630195 | 0.5769006245067703 |
| 0.4920844640668064                                              | 0.6043966307010414 | 0.3779922350968041 |
| 0.4321571141390678                                              | 0.6335232328256072 | 0.3635000043990637 |
| 0.4524003239882218                                              | 0.6809989089356274 | 0.3313409541867339 |
| 0.5450186326577122                                              | 0.6343064153484020 | 0.6457623580183521 |
| 0.5816941649557360                                              | 0.6819044518433655 | 0.6547128557741063 |
| 0.6213798787787939                                              | 0.7750774289184017 | 0.5908491954163106 |
| 0.3870804502084780                                              | 0.8038869986616540 | 0.5443940634463179 |
| 0.3544552099112428                                              | 0.7272633069887896 | 0.5969279180415787 |
| 0.3647661368470125                                              | 0.7743212792775586 | 0.4292100101379077 |
| 0.4422407873005990                                              | 0.8322551541885426 | 0.5222051230298319 |
| 0.4749078325129453                                              | 0.7276167431586312 | 0.6727946977749776 |
| 0.4394015981042860                                              | 0.6817020504231976 | 0.6641292519895030 |
| 0.3753692227685814                                              | 0.6339107169411748 | 0.5877964353788060 |
| 0.3492446199074967                                              | 0.6337292678967948 | 0.5224546420851158 |
| 0.5036193734036598                                              | 0.8324277256421397 | 0.5608623920500294 |
| 0.5593568482025348                                              | 0.8324123668624690 | 0.5144420804607142 |
| 0.5324332871391970                                              | 0.8322244654167705 | 0.4470939125996800 |
| 0.4748059985539554                                              | 0.6342045242268627 | 0.6504169711325750 |

|                    |                    |                    |
|--------------------|--------------------|--------------------|
| 0.4349245039174481 | 0.6047695590844981 | 0.6037346589877842 |
| 0.3814803605708814 | 0.6044016154170549 | 0.4700965338879395 |
| 0.3911448402278193 | 0.7747523070487908 | 0.6061093304208689 |
| 0.3475611788634864 | 0.7744471402255880 | 0.4971285364868611 |
| 0.3779485926430357 | 0.6815223365284877 | 0.6254229894185784 |
| 0.4504349007769761 | 0.7749247463222062 | 0.6434531818538768 |
| 0.4600529333981974 | 0.8321237471965676 | 0.4518919661745066 |
| 0.4220567226480485 | 0.8036368644320667 | 0.4062802872337513 |
| 0.3624174274809743 | 0.7268218999508697 | 0.3914698726691601 |
| 0.3428242569171778 | 0.6810250280145540 | 0.4226149855218277 |
| 0.5076400186505965 | 0.8042377465716580 | 0.6203265988285374 |
| 0.5675532042233694 | 0.7750965337603810 | 0.6357015575030139 |
| 0.5474106190587457 | 0.7277200601980685 | 0.6679966098062826 |
| 0.4549567392946358 | 0.7742974222997285 | 0.3540971416000603 |
| 0.4182507125596509 | 0.7268101085996047 | 0.3449667326334386 |
| 0.3780989745557218 | 0.6335317111607706 | 0.4085464190620658 |
| 0.6138673524066842 | 0.6047411724812722 | 0.4546950792983710 |
| 0.6455542448362305 | 0.6814586935418386 | 0.4025630057863407 |
| 0.6353155098789808 | 0.6342877382720820 | 0.5705593009683622 |
| 0.5577301030074910 | 0.5770120355175865 | 0.4772785928149110 |
| 0.5248718838047604 | 0.6811012852655647 | 0.3265373261904849 |
| 0.5602889515731909 | 0.7270065594189827 | 0.3355739599838172 |
| 0.6241911343473349 | 0.7746911219339788 | 0.4120164181983759 |
| 0.6502042624007546 | 0.7748756187182608 | 0.4770774981584069 |
| 0.4961625855119701 | 0.5768218641411857 | 0.4384863155152490 |
| 0.4402343523635159 | 0.5768033702492018 | 0.4850584491724668 |
| 0.4672598235738995 | 0.5770028345128793 | 0.5526199002756141 |
| 0.5248718331417599 | 0.7743927378552826 | 0.3494666646366682 |
| 0.5642221909673580 | 0.8038331488190794 | 0.3968645036124193 |
| 0.6171094275085092 | 0.8042076161815150 | 0.5291447474539888 |
| 0.6725259539713330 | 0.6816487035939321 | 0.4699938700990813 |
| 0.6746333660853524 | 0.7275670652729784 | 0.5064704416454349 |
| 0.3274722603532881 | 0.7270724725130930 | 0.5294667853202589 |

|                    |                    |                    |
|--------------------|--------------------|--------------------|
| 0.3249898792634200 | 0.6811500161577071 | 0.4930157564193615 |
| 0.6089141662922298 | 0.2252594964843917 | 0.3938992382464270 |
| 0.6524989120227414 | 0.2255731238790429 | 0.5028780233849747 |
| 0.6221262638854805 | 0.3184845979968423 | 0.3745693078753750 |
| 0.5496280986254998 | 0.2250736697150301 | 0.3565521789671897 |
| 0.5400001717342457 | 0.1678912152240288 | 0.5481135534302887 |
| 0.5780024051544111 | 0.1963812117986433 | 0.5937236535671607 |
| 0.6376522849733937 | 0.2732009001131031 | 0.6085330012828496 |
| 0.6572563563494935 | 0.3189937112763287 | 0.5773900604490396 |
| 0.4924222909335408 | 0.1957581400855077 | 0.3796809864089808 |
| 0.4325110523173685 | 0.2248932344424076 | 0.3643092522024224 |
| 0.4526594453965009 | 0.2722698886674614 | 0.3320145380900160 |
| 0.5451004711468463 | 0.2257208534314757 | 0.6459021188958273 |
| 0.5818101850795719 | 0.2732116049006568 | 0.6550287944246552 |
| 0.6219672115451247 | 0.3664795355815129 | 0.5914519179737412 |
| 0.3861886065870229 | 0.3952696689718163 | 0.5453008649469642 |
| 0.3545233279148223 | 0.3185415157200244 | 0.5974279739210104 |
| 0.3647478579774618 | 0.3657075574251289 | 0.4294345641309121 |
| 0.4423235164934323 | 0.4230083112516559 | 0.5227160354144008 |
| 0.4751898769475669 | 0.3189073619173659 | 0.6734560092640396 |
| 0.4397692180149080 | 0.2729969070883480 | 0.6644331073493828 |
| 0.3758682027654269 | 0.2253037593885559 | 0.5879855111969644 |
| 0.3498546504917711 | 0.2251105586649479 | 0.5229242015599197 |
| 0.5038932052930839 | 0.4231821613145214 | 0.5615050846803363 |
| 0.5598163957886869 | 0.4231770945565652 | 0.5149346498785030 |
| 0.5327959299843880 | 0.4229812870987471 | 0.4473786640386958 |
| 0.4751857840099296 | 0.2256128415417538 | 0.6505399454692974 |
| 0.4358359724483949 | 0.1961667203823988 | 0.6031422747359816 |
| 0.3829460610707847 | 0.1957771076838551 | 0.4708587610687798 |
| 0.3911010810951885 | 0.3661435220016530 | 0.6067481974848732 |
| 0.3474699935147978 | 0.3658291389747415 | 0.4976380618642036 |
| 0.3782915615446415 | 0.2728100336148925 | 0.6256974963184202 |
| 0.4506413101195041 | 0.3663153451854121 | 0.6442573125834421 |

|                    |                    |                    |
|--------------------|--------------------|--------------------|
| 0.4601972438113772 | 0.4228839771675020 | 0.4521941323681060 |
| 0.4215301530053018 | 0.3950259971207089 | 0.4057760717283871 |
| 0.3625629511150208 | 0.3180956571363953 | 0.3917673870555526 |
| 0.3432750972424413 | 0.2722888135684937 | 0.4230981392996513 |
| 0.5079777601690499 | 0.3956107165613447 | 0.6219971502188623 |
| 0.5679053846940394 | 0.3664906593918920 | 0.6364890141741443 |
| 0.5476613382643558 | 0.3190178878085655 | 0.6686552021817369 |
| 0.4550501653971469 | 0.3656894838206581 | 0.3542370925657240 |
| 0.4183779213486500 | 0.3180853550957631 | 0.3452952778040286 |
| 0.3786778223237265 | 0.2249040928580132 | 0.4091535262193546 |
| 0.6129758491536521 | 0.1961305591691127 | 0.4556159601973448 |
| 0.6456058530990902 | 0.2727515837006378 | 0.4030774305384916 |
| 0.6352980184526280 | 0.2256989889875705 | 0.5707958943107041 |
| 0.5578113837838210 | 0.1677593296808243 | 0.4778023158726971 |
| 0.5251612746354787 | 0.2723783900736593 | 0.3272064750837559 |
| 0.5606712595498448 | 0.3182949627917664 | 0.3358650454985992 |
| 0.6247001031665008 | 0.3660936508199004 | 0.4122030468100839 |
| 0.6508214396739423 | 0.3662769275499979 | 0.4775419232664688 |
| 0.4964350274231115 | 0.1675700551954525 | 0.4391449022255360 |
| 0.4406962768009152 | 0.1675773872565264 | 0.4855630374760009 |
| 0.4676200568702825 | 0.1677763966742746 | 0.5529113036718440 |
| 0.5252631608842813 | 0.3657897534194718 | 0.3495764339408178 |
| 0.5651386828712018 | 0.3952245707175366 | 0.3962648861585486 |
| 0.6185748701402877 | 0.3955970516066300 | 0.5298972828665623 |
| 0.6725924936711385 | 0.2729476408978757 | 0.4705382393282607 |
| 0.6750906261920947 | 0.3188658450635824 | 0.5069883739724669 |
| 0.3275550669627587 | 0.3183432947487582 | 0.5299985570906858 |
| 0.3254280396267871 | 0.2724165073660398 | 0.4935269297804717 |
| 0.4999622835247982 | 0.5000041220888310 | 0.4999903994012323 |

#### Atomic coordination of Cr&(B@C<sub>60</sub>)<sub>2</sub>\_η<sup>6</sup>

Cr&(B@C<sub>60</sub>)<sub>2</sub>\_η<sup>6</sup>

1.0000000000000000

|                     |                     |                     |
|---------------------|---------------------|---------------------|
| 20.0000000000000000 | 0.0000000000000000  | 0.0000000000000000  |
| 0.0000000000000000  | 20.0000000000000000 | 0.0000000000000000  |
| 0.0000000000000000  | 0.0000000000000000  | 26.0000000000000000 |

|     |   |    |
|-----|---|----|
| C   | B | Cr |
| 120 | 2 | 1  |

Selective dynamics

Direct

|                    |                    |                    |
|--------------------|--------------------|--------------------|
| 0.3456411772130888 | 0.4635801439536998 | 0.6292303851965397 |
| 0.3332117448358811 | 0.5589030162633599 | 0.6814481439979777 |
| 0.3654456308995219 | 0.3845256588232306 | 0.7008390659438077 |
| 0.3901675651042825 | 0.4278627057929653 | 0.5980974106694646 |
| 0.4247878108871666 | 0.6306807519484438 | 0.6182164439215908 |
| 0.4124116169595097 | 0.6521533335748573 | 0.6686866993821322 |
| 0.3916086879146579 | 0.6154472932765996 | 0.7529889454776476 |
| 0.3838656606743138 | 0.5588169818058167 | 0.7841288070996856 |
| 0.4378192693803845 | 0.4646308898308580 | 0.5663906647968946 |
| 0.5003663182877710 | 0.4284345576508368 | 0.5663748900105692 |
| 0.4922449919055068 | 0.3688149837603876 | 0.5980918616221143 |
| 0.4673799197654924 | 0.6742775514404176 | 0.7008091943347752 |
| 0.4545661787776771 | 0.6517309707453629 | 0.7529699131320799 |
| 0.4387020339433535 | 0.5362863842118394 | 0.8163251197197897 |
| 0.6542207306261969 | 0.4635028796702794 | 0.7529589442342872 |
| 0.6674391392868543 | 0.5585386473520492 | 0.7007827003359809 |
| 0.6342548632777802 | 0.3847243505524804 | 0.6814127883492075 |
| 0.6089841494604712 | 0.4285576144153919 | 0.7840995311342915 |
| 0.5751963535174041 | 0.6298701929228621 | 0.7640439248738073 |
| 0.5875949870722996 | 0.6513118990266460 | 0.7136266966879357 |
| 0.6089730145476210 | 0.6152564852813289 | 0.6291974216779509 |
| 0.6175854648625954 | 0.5588782084799869 | 0.5980379485846813 |
| 0.5621093088799152 | 0.4648722625381689 | 0.8163039353909826 |
| 0.4992738864188689 | 0.4286802938817774 | 0.8163086566737382 |
| 0.5071986148638310 | 0.3699274384957093 | 0.7841079210126224 |
| 0.5327989829241454 | 0.6738972352665621 | 0.6814168721134055 |

|                    |                    |                    |
|--------------------|--------------------|--------------------|
| 0.5456681531175921 | 0.6518936675238974 | 0.6292051857155436 |
| 0.5618868100535475 | 0.5361061738829819 | 0.5663686087290430 |
| 0.6542998848976339 | 0.5361791502698650 | 0.7529487624538723 |
| 0.6673370138879380 | 0.4411606718342815 | 0.7007895402668890 |
| 0.6344933355180677 | 0.6150673591874223 | 0.6814026925967450 |
| 0.6090986121973181 | 0.5711741741376873 | 0.7840600198139058 |
| 0.5749587291114843 | 0.3699284868043024 | 0.7641019886986000 |
| 0.5872616526622298 | 0.3485876814956322 | 0.7136556401488606 |
| 0.6087750631692860 | 0.3845503602103202 | 0.6291896259013476 |
| 0.6174840894004477 | 0.4409428044687576 | 0.5980251504203425 |
| 0.5621666974900972 | 0.5349305237760514 | 0.8162838335472622 |
| 0.4994077294726695 | 0.5712463782706243 | 0.8162958807175249 |
| 0.5074336370156329 | 0.6299959439581142 | 0.7840705768165481 |
| 0.5324389358789994 | 0.3260883979095575 | 0.6814350179729803 |
| 0.5453973624965907 | 0.3480207702393472 | 0.6292076923305565 |
| 0.5618317901052690 | 0.4638424199127391 | 0.5663512994640559 |
| 0.3457174104563203 | 0.5367451767945494 | 0.6292204399782814 |
| 0.3331102951207568 | 0.4414044903383056 | 0.6814555144320690 |
| 0.3656719008015714 | 0.6157014878511406 | 0.7008282552843710 |
| 0.3902866836711675 | 0.5724072852960784 | 0.5980595354561737 |
| 0.4245438403712245 | 0.3695114377707217 | 0.6182622902240072 |
| 0.4120752439056257 | 0.3479516460839617 | 0.6687096521537926 |
| 0.3914089254270339 | 0.3847431595688212 | 0.7529869423445124 |
| 0.3837583262003754 | 0.4413615875840360 | 0.7841275814874743 |
| 0.4378840984929092 | 0.5355599023851348 | 0.5663863978817166 |
| 0.5005011608312450 | 0.5716241501234891 | 0.5663873130311986 |
| 0.4924861264330582 | 0.6312575604069443 | 0.5980667584808077 |
| 0.4670217847921254 | 0.3257644061020211 | 0.7008262091809589 |
| 0.4542909066439131 | 0.3483598602724714 | 0.7529786204949475 |
| 0.4386432456676608 | 0.4637600093057138 | 0.8163184364202134 |
| 0.3253062211835036 | 0.5001545100799210 | 0.7136955138025426 |
| 0.3499593207210342 | 0.5001166790881677 | 0.7641335506057908 |
| 0.6756452955572269 | 0.4998490777083755 | 0.6686414935463439 |

|                    |                    |                    |
|--------------------|--------------------|--------------------|
| 0.6508542404969818 | 0.4998836090906822 | 0.6181735082822885 |
| 0.3455570692428269 | 0.4637882838619202 | 0.2469956782736234 |
| 0.3324882952176783 | 0.5588482086498161 | 0.2991406817746290 |
| 0.3654001729509193 | 0.3849579855514776 | 0.3184873150731523 |
| 0.3908361736543794 | 0.4288375136562849 | 0.2159659526476680 |
| 0.4250346284613714 | 0.6299960148094864 | 0.2359545589447240 |
| 0.4126536119659500 | 0.6514780272973494 | 0.2862997665229466 |
| 0.3911758279268730 | 0.6154491450025746 | 0.3706991560777205 |
| 0.3824090240217267 | 0.5590870332268220 | 0.4017967830282123 |
| 0.4377806605977583 | 0.4650460265738678 | 0.1837358920426560 |
| 0.5005763979621464 | 0.4287273307262440 | 0.1837063752064959 |
| 0.4925414487032190 | 0.3699697198001004 | 0.2159094495377848 |
| 0.4675620362614052 | 0.6740071431625664 | 0.3184911399840257 |
| 0.4546101022175735 | 0.6520070862901375 | 0.3706997854562153 |
| 0.4381683634846955 | 0.5362022207277954 | 0.4334407632574597 |
| 0.6545042996920613 | 0.4632976184876363 | 0.3707002309353447 |
| 0.6670842876591945 | 0.5586456151495851 | 0.3184758038123152 |
| 0.6343947785442702 | 0.3843568970263677 | 0.2991180446256263 |
| 0.6097529777397863 | 0.4276930538485812 | 0.4016730446374316 |
| 0.5755714125371977 | 0.6305830196686629 | 0.3816517913753031 |
| 0.5879918746652680 | 0.6520684812077284 | 0.3312458148088629 |
| 0.6086923563212698 | 0.6153062737490151 | 0.2469813484488852 |
| 0.6162562198998871 | 0.5586526935209181 | 0.2159240936675738 |
| 0.5621257345927431 | 0.4645434333990981 | 0.4333290877986724 |
| 0.4994553129003576 | 0.4284440646949222 | 0.4333587667267554 |
| 0.5074703045492274 | 0.3687352173989126 | 0.4017302373142365 |
| 0.5330077433310253 | 0.6743326344378752 | 0.2991187520739850 |
| 0.5457934324360378 | 0.6517377354422977 | 0.2469707707883612 |
| 0.5613606950117231 | 0.5362168914733931 | 0.1837017970696871 |
| 0.6545681949307570 | 0.5364800957786517 | 0.3707055350731031 |
| 0.6669952679322250 | 0.4410914224777929 | 0.3184727373376717 |
| 0.6346454857190734 | 0.6154436340014272 | 0.2991298001792146 |
| 0.6099400978465410 | 0.5721711732000262 | 0.4017181666575048 |



|                    |                    |                    |
|--------------------|--------------------|--------------------|
| 0.5752483642576453 | 0.3693362867472548 | 0.3816146651816744 |
| 0.5876598104574527 | 0.3477883136761904 | 0.3312232506551480 |
| 0.6084132895024230 | 0.3845642530091187 | 0.2469780066937257 |
| 0.6161368954875296 | 0.4411682353037279 | 0.2159101045848628 |
| 0.5622231490289539 | 0.5354029953908579 | 0.4333629543438419 |
| 0.4996294790406581 | 0.5715890202006289 | 0.4334059941995267 |
| 0.5077979881962313 | 0.6313104622694629 | 0.4017960119322149 |
| 0.5325910001216100 | 0.3256584487837880 | 0.2991112183860308 |
| 0.5454186762353186 | 0.3482517230437909 | 0.2469723029178621 |
| 0.5612720664710378 | 0.4636888964854646 | 0.1836944080435536 |
| 0.3456144264066688 | 0.5364631043519076 | 0.2469904598648281 |
| 0.3324000417600275 | 0.4414298294457528 | 0.2991447322886316 |
| 0.3656542201676117 | 0.6152501599627871 | 0.3184904417655757 |
| 0.3910022897066935 | 0.5713303181517475 | 0.2159949907831486 |
| 0.4247313799489449 | 0.3701163519382175 | 0.2359342264659092 |
| 0.4123240680448197 | 0.3486770703342942 | 0.2862875338450417 |
| 0.3908705755457814 | 0.3846598560267059 | 0.3707114956061430 |
| 0.3822979472792272 | 0.4410961332934277 | 0.4017760412128793 |
| 0.4378685893903287 | 0.5350398253780728 | 0.1837616462566339 |
| 0.5007429353732019 | 0.5712642546740313 | 0.1837397488711119 |
| 0.4928450587723484 | 0.6300240519915854 | 0.2159530552450469 |
| 0.4671437056247698 | 0.3260074351906914 | 0.3184850385243455 |
| 0.4542079444557162 | 0.3479876714136172 | 0.3707076409853190 |
| 0.4380730488545996 | 0.4639089702710305 | 0.4334275201208795 |
| 0.3241401993713222 | 0.5001450891757631 | 0.3312664549814211 |
| 0.3490272882004870 | 0.5001133291831540 | 0.3816583519190761 |
| 0.6748742369136927 | 0.4998614245389447 | 0.2862760890561213 |
| 0.6500412519182398 | 0.4998882003325772 | 0.2359362888284316 |
| 0.5003183055690533 | 0.4996420532165760 | 0.6903465665171603 |
| 0.5001199430653041 | 0.4999241133734671 | 0.3141915662224467 |
| 0.4999449824053680 | 0.5000181113854479 | 0.4997837697527755 |

**Atomic coordination of [V(B@C<sub>60</sub>)<sub>2</sub>η<sup>6</sup>]<sub>∞</sub>**[V(B@C<sub>60</sub>)<sub>2</sub>η<sup>6</sup>]<sub>∞</sub>

1.0000000000000000

|                     |                    |                    |
|---------------------|--------------------|--------------------|
| 20.0000000000000000 | 0.0000000000000000 | 0.0000000000000000 |
|---------------------|--------------------|--------------------|

|                    |                     |                    |
|--------------------|---------------------|--------------------|
| 0.0000000000000000 | 20.0000000000000000 | 0.0000000000000000 |
|--------------------|---------------------|--------------------|

|                    |                    |                    |
|--------------------|--------------------|--------------------|
| 0.0000000000000000 | 0.0000000000000000 | 19.679999999999997 |
|--------------------|--------------------|--------------------|

|   |     |   |
|---|-----|---|
| B | C   | V |
| 2 | 120 | 2 |

**Selective dynamics****Direct**

|                    |                    |                    |
|--------------------|--------------------|--------------------|
| 0.5078638436231975 | 0.5159960000000012 | 0.2081218770612458 |
| 0.4843780122772500 | 0.5159960000000012 | 0.7083201700012230 |
| 0.3416115181408728 | 0.4793919438026148 | 0.1151902058391625 |
| 0.3287527214092310 | 0.5748018264118647 | 0.1838814817938724 |
| 0.3615094871620311 | 0.4003847740564716 | 0.2096577950268973 |
| 0.3865518063428768 | 0.4438104307833743 | 0.0745459849919703 |
| 0.4208883334534383 | 0.6465235217063703 | 0.1009681331865746 |
| 0.4083791623095142 | 0.6680869714255796 | 0.1674408212430690 |
| 0.3871027300375943 | 0.6315711888426577 | 0.2783623019588286 |
| 0.3786738604300849 | 0.5749212814156791 | 0.3190750350094702 |
| 0.4339636157394066 | 0.4804214548363000 | 0.0330028249325598 |
| 0.4967382697530071 | 0.4442618807862571 | 0.0331482056762329 |
| 0.4886261260022254 | 0.3849172684782213 | 0.0746250981044893 |
| 0.4633925966642561 | 0.6904071027987645 | 0.2096594214481531 |
| 0.4505006852452400 | 0.6681569748108163 | 0.2783335568581008 |
| 0.4340278411742222 | 0.5522380764319816 | 0.3606779843051923 |
| 0.6507203490278738 | 0.4793927578853954 | 0.2783152885084415 |
| 0.6636778962583525 | 0.5748141347909312 | 0.2096376476251482 |
| 0.6309166725008216 | 0.4003441399571023 | 0.1838924668478382 |
| 0.6057595535243873 | 0.4438292540808015 | 0.3190262180383921 |
| 0.5714576367319735 | 0.6465312889524157 | 0.2926153388052789 |
| 0.5840056212818285 | 0.6680849287288391 | 0.2261071490140249 |

|                    |                    |                    |
|--------------------|--------------------|--------------------|
| 0.6052930023253725 | 0.6315790771249005 | 0.1152063115565417 |
| 0.6137780434457294 | 0.5749308653618497 | 0.0745123725809383 |
| 0.5584689298539302 | 0.4803724402616809 | 0.3607702980212071 |
| 0.4956718030234117 | 0.4441857565702668 | 0.3606175597294072 |
| 0.5037522418287436 | 0.3849033060106427 | 0.3190151213366661 |
| 0.5290179651367067 | 0.6904494220262530 | 0.1838995238366224 |
| 0.5419009919045664 | 0.6681773391610883 | 0.1152342767878174 |
| 0.5583712414102443 | 0.5522360859750036 | 0.0329895589845932 |
| 0.6507203490278738 | 0.5525992421146070 | 0.2783152885084415 |
| 0.6636778962583525 | 0.4571778652090724 | 0.2096376476251482 |
| 0.6309166725008216 | 0.6316478600428936 | 0.1838924668478382 |
| 0.6057595535243873 | 0.5881627459191936 | 0.3190262180383921 |
| 0.5714576367319735 | 0.3854607110475871 | 0.2926153388052789 |
| 0.5840056212818285 | 0.3639070712711643 | 0.2261071490140249 |
| 0.6052930023253725 | 0.4004129228751017 | 0.1152063115565417 |
| 0.6137780434457294 | 0.4570611346381462 | 0.0745123725809383 |
| 0.5584689298539302 | 0.5516195597383213 | 0.3607702980212071 |
| 0.4956718030234117 | 0.5878062434297349 | 0.3606175597294072 |
| 0.5037522418287436 | 0.6470886939893598 | 0.3190151213366661 |
| 0.5290179651367067 | 0.3415425779737493 | 0.1838995238366224 |
| 0.5419009919045664 | 0.3638146608389073 | 0.1152342767878174 |
| 0.5583712414102443 | 0.4797559140249991 | 0.0329895589845932 |
| 0.3416115181408728 | 0.5526000561973814 | 0.1151902058391625 |
| 0.3287527214092310 | 0.4571901735881377 | 0.1838814817938724 |
| 0.3615094871620311 | 0.6316072259435239 | 0.2096577950268973 |
| 0.3865518063428768 | 0.5881815692166275 | 0.0745459849919703 |
| 0.4208883334534383 | 0.3854684782936325 | 0.1009681331865746 |
| 0.4083791623095142 | 0.3639040285744182 | 0.1674408212430690 |
| 0.3871027300375943 | 0.4004208111573455 | 0.2783623019588286 |
| 0.3786738604300849 | 0.4570707185843235 | 0.3190750350094702 |
| 0.4339636157394066 | 0.5515705451637097 | 0.0330028249325598 |
| 0.4967382697530071 | 0.5877301192137454 | 0.0331482056762329 |
| 0.4886261260022254 | 0.6470747315217807 | 0.0746250981044893 |

|                    |                    |                    |
|--------------------|--------------------|--------------------|
| 0.4633925966642561 | 0.3415848972012389 | 0.2096594214481531 |
| 0.4505006852452400 | 0.3638350251891866 | 0.2783335568581008 |
| 0.4340278411742222 | 0.4797539235680208 | 0.3606779843051923 |
| 0.3206283499940339 | 0.5159960000000012 | 0.2261211202618808 |
| 0.3453161418468369 | 0.5159960000000012 | 0.2926894632686055 |
| 0.6718786747147822 | 0.5159960000000012 | 0.1674077575478010 |
| 0.6471359520275219 | 0.5159960000000012 | 0.1008741273085947 |
| 0.3414429065753167 | 0.4793985389643406 | 0.6152243249838906 |
| 0.3286114085047863 | 0.5748246784083531 | 0.6839102166704973 |
| 0.3616422150473305 | 0.4004570728244411 | 0.7096706192627098 |
| 0.3864032298262273 | 0.4438182344806817 | 0.5746286018332992 |
| 0.4208075272175347 | 0.6465291648263563 | 0.6009545619533314 |
| 0.4084726780226147 | 0.6680442919265084 | 0.6674603891080574 |
| 0.3874551656845996 | 0.6315350252907116 | 0.7783193837297541 |
| 0.3791449858495778 | 0.5748690338531801 | 0.8190125233493765 |
| 0.4337696310264427 | 0.4804568054174221 | 0.5331393864235144 |
| 0.4965011257510886 | 0.4441737197201396 | 0.5329448322408887 |
| 0.4884974297995682 | 0.3848616409849808 | 0.5745216364682613 |
| 0.4635224879043444 | 0.6904009832334217 | 0.7096651951582725 |
| 0.4508292675733870 | 0.6681809183127684 | 0.7783682307636759 |
| 0.4344781995626666 | 0.5522420137091995 | 0.8607343844911249 |
| 0.6510195426490966 | 0.4793979436675131 | 0.7782986873417044 |
| 0.6638164438949585 | 0.5748078748716358 | 0.7096035688502227 |
| 0.6309532565788812 | 0.4004093598492821 | 0.6838540197593093 |
| 0.6061671302417962 | 0.4437939563465715 | 0.8189918774987265 |
| 0.5718167255007307 | 0.6465779942736908 | 0.7926634496407818 |
| 0.5841157188853353 | 0.6680254377501806 | 0.7260997795947285 |
| 0.6052274920590397 | 0.6315849048212324 | 0.6151842643110069 |
| 0.6135652165905662 | 0.5749084082421958 | 0.5745453509612848 |
| 0.5588651674256787 | 0.4804239367968420 | 0.8605739913904834 |
| 0.4961436767232618 | 0.4441118461864820 | 0.8607632573021644 |
| 0.5041324132301830 | 0.3848438658399567 | 0.8191043345295611 |
| 0.5290952034349389 | 0.6903929941837166 | 0.6838818936517124 |

|                    |                    |                    |
|--------------------|--------------------|--------------------|
| 0.5418221062373739 | 0.6681690242405625 | 0.6151872611991400 |
| 0.5581074405437736 | 0.5522143383276853 | 0.5330545883089580 |
| 0.6510195426490966 | 0.5525940563324894 | 0.7782986873417044 |
| 0.6638164438949585 | 0.4571841251283665 | 0.7096035688502227 |
| 0.6309532565788812 | 0.6315826401507136 | 0.6838540197593093 |
| 0.6061671302417962 | 0.5881980436534242 | 0.8189918774987265 |
| 0.5718167255007307 | 0.3854140057263038 | 0.7926634496407818 |
| 0.5841157188853353 | 0.3639665622498224 | 0.7260997795947285 |
| 0.6052274920590397 | 0.4004070951787698 | 0.6151842643110069 |
| 0.6135652165905662 | 0.4570835917577997 | 0.5745453509612848 |
| 0.5588651674256787 | 0.5515680632031613 | 0.8605739913904834 |
| 0.4961436767232618 | 0.5878801538135198 | 0.8607632573021644 |
| 0.5041324132301830 | 0.6471481341600458 | 0.8191043345295611 |
| 0.5290952034349389 | 0.3415990058162858 | 0.6838818936517124 |
| 0.5418221062373739 | 0.3638229757594326 | 0.6151872611991400 |
| 0.5581074405437736 | 0.4797776616723172 | 0.5330545883089580 |
| 0.3414429065753167 | 0.5525934610356551 | 0.6152243249838906 |
| 0.3286114085047863 | 0.4571673215916487 | 0.6839102166704973 |
| 0.3616422150473305 | 0.6315349271755548 | 0.7096706192627098 |
| 0.3864032298262273 | 0.5881737655193204 | 0.5746286018332992 |
| 0.4208075272175347 | 0.3854628351736470 | 0.6009545619533314 |
| 0.4084726780226147 | 0.3639467080734891 | 0.6674603891080574 |
| 0.3874551656845996 | 0.4004569747092908 | 0.7783193837297541 |
| 0.3791449858495778 | 0.4571229661468218 | 0.8190125233493765 |
| 0.4337696310264427 | 0.5515351945825803 | 0.5331393864235144 |
| 0.4965011257510886 | 0.5878182802798632 | 0.5329448322408887 |
| 0.4884974297995682 | 0.6471303590150210 | 0.5745216364682613 |
| 0.4635224879043444 | 0.3415910167665811 | 0.7096651951582725 |
| 0.4508292675733870 | 0.3638110816872341 | 0.7783682307636759 |
| 0.4344781995626666 | 0.4797499862908097 | 0.8607343844911249 |
| 0.3205335098396077 | 0.5159960000000012 | 0.7261184159090945 |
| 0.3457315747783255 | 0.5159960000000012 | 0.7925650368095916 |
| 0.6719577848206771 | 0.5159960000000012 | 0.6673762766227986 |

|                    |                    |                    |
|--------------------|--------------------|--------------------|
| 0.6469634308447623 | 0.5159960000000012 | 0.6009211546939902 |
| 0.4961803844249181 | 0.5159960000000012 | 0.4465672852762978 |
| 0.4963453518901495 | 0.5159960000000012 | 0.9465591295910251 |

### Atomic coordination of $[\text{Cr}(\text{B}@\text{C}_{60})_2\eta^5]_\infty$

$[\text{Cr}(\text{B}@\text{C}_{60})_2\eta^5]_\infty$

1.0000000000000000

|                     |                     |                     |
|---------------------|---------------------|---------------------|
| 20.0000000000000000 | 0.0000000000000000  | 0.0000000000000000  |
| 0.0000000000000000  | 21.2799999999999976 | 0.0000000000000000  |
| 0.0000000000000000  | 0.0000000000000000  | 20.0000000000000000 |

B C Cr

2 120 2

### Selective dynamics

Direct

|                    |                    |                    |
|--------------------|--------------------|--------------------|
| 0.5039501595467897 | 0.2503932469126795 | 0.4982950383572274 |
| 0.5038302171935812 | 0.7504310149003430 | 0.4991508546976959 |
| 0.6089779827661843 | 0.1642366909572815 | 0.3935664828858734 |
| 0.6526124142038014 | 0.1647034311482756 | 0.5026754078282991 |
| 0.6218049784800286 | 0.2782034154540725 | 0.3747014289577635 |
| 0.5492555725108518 | 0.1641644154914203 | 0.3561165413229475 |
| 0.5401830117280184 | 0.0945815188274253 | 0.5482164975751614 |
| 0.5789704324522307 | 0.1285630576736949 | 0.5946802277121890 |
| 0.6382329095086520 | 0.2227399070652326 | 0.6086252495735850 |
| 0.6575889831361578 | 0.2786590245678084 | 0.5773615670059726 |
| 0.4920024314764646 | 0.1286008419740270 | 0.3786850982618262 |
| 0.4319783136739802 | 0.1642757449766492 | 0.3642634926551907 |
| 0.4520181961818749 | 0.2221422236491222 | 0.3320070702753953 |
| 0.5456214107692716 | 0.1645780153820908 | 0.6461033328428486 |
| 0.5823708286483581 | 0.2226267396281614 | 0.6551927767790532 |
| 0.6221396157142891 | 0.3365913518335261 | 0.5911832836916914 |
| 0.3863734434687914 | 0.3719722810845382 | 0.5454734483509540 |
| 0.3545721362265937 | 0.2783822207162103 | 0.5975594502610518 |
| 0.3645597781840522 | 0.3360284273118950 | 0.4295794911203786 |

|                    |                    |                    |
|--------------------|--------------------|--------------------|
| 0.4423472326026854 | 0.4059962062335387 | 0.5228096822306583 |
| 0.4754976190629421 | 0.2786307581601336 | 0.6733383779071503 |
| 0.4400235204501826 | 0.2226347389673649 | 0.6644928037718215 |
| 0.3756226179976068 | 0.1644897967648262 | 0.5881729477710846 |
| 0.3493566152883290 | 0.1641879206334238 | 0.5228842399615203 |
| 0.5040320241307298 | 0.4060398098916522 | 0.5614827009052448 |
| 0.5600198268268600 | 0.4064173551507224 | 0.5149769427414199 |
| 0.5325951686261020 | 0.4057115468234186 | 0.4475761774686333 |
| 0.4753424019606384 | 0.1646659565809543 | 0.6508162284245813 |
| 0.4354319619131956 | 0.1290602736003663 | 0.6038752688327164 |
| 0.3813072987878030 | 0.1281424666287024 | 0.4706090814475559 |
| 0.3911546247531206 | 0.3364650415363925 | 0.6068966148620162 |
| 0.3475286683601339 | 0.3359904269364975 | 0.4977756970966709 |
| 0.3783063314073658 | 0.2225249690118716 | 0.6257667352754837 |
| 0.4508679617512570 | 0.3365521186915217 | 0.6443412160460582 |
| 0.4599627226210501 | 0.4061353858297991 | 0.4522149255618047 |
| 0.4211702943791238 | 0.3721526084436774 | 0.4057697172143548 |
| 0.3618973931394152 | 0.2779760468122277 | 0.3918249006637140 |
| 0.3425343154637090 | 0.2220692201734878 | 0.4230900879597854 |
| 0.5081262071563089 | 0.3721197211942737 | 0.6217655257510942 |
| 0.5681525704073138 | 0.3364425167327028 | 0.6361866487006721 |
| 0.5481101874294367 | 0.2785710809663513 | 0.6684430043435937 |
| 0.4545156218367837 | 0.3361486503804513 | 0.3543315854993168 |
| 0.4177626066390658 | 0.2780910972716697 | 0.3452552154140776 |
| 0.3780013346567231 | 0.1641410771611973 | 0.4092712003821433 |
| 0.6137819021944821 | 0.1287158716903747 | 0.4549781124750893 |
| 0.6455303368050520 | 0.2223291286245015 | 0.4029075877525656 |
| 0.6355824884760252 | 0.1646772350114318 | 0.5708766585718621 |
| 0.5578031295316209 | 0.0946877967111775 | 0.4776353355160196 |
| 0.5246288493806901 | 0.2220892853782317 | 0.3271344605282351 |
| 0.5601001601989850 | 0.2780982484890870 | 0.3359656270123708 |
| 0.6245158110465781 | 0.3362564160167949 | 0.4122637312856980 |
| 0.6507727819140995 | 0.3365464395265504 | 0.4775651149487602 |

|                    |                    |                    |
|--------------------|--------------------|--------------------|
| 0.4961103451543920 | 0.0946711965744384 | 0.4389616869014929 |
| 0.4401430716109048 | 0.0943308669163869 | 0.4854686843174818 |
| 0.4675628235296116 | 0.0950466921985225 | 0.5528483469362654 |
| 0.5247993083873225 | 0.3360868197534827 | 0.3496032396454751 |
| 0.5647271314252720 | 0.3717110599225251 | 0.3965290375907954 |
| 0.6188425869519422 | 0.3726031608901935 | 0.5298467724435056 |
| 0.6726970594461720 | 0.2226313894504486 | 0.4704292695078606 |
| 0.6752594844012522 | 0.2786508176093108 | 0.5068837198821399 |
| 0.3274129384521843 | 0.2780787884587283 | 0.5300314782175589 |
| 0.3248462164653034 | 0.2220776609202630 | 0.4935673810440875 |
| 0.6089026916761924 | 0.6642510342549245 | 0.3935389943464926 |
| 0.6526064242630413 | 0.6647102263286371 | 0.5026624786088263 |
| 0.6218132026505573 | 0.7781616893735686 | 0.3746703300511456 |
| 0.5493116932131699 | 0.6641576378468983 | 0.3561436392574323 |
| 0.5401923174516911 | 0.5946131812426713 | 0.5482408565740328 |
| 0.5789793294443510 | 0.6285830943330950 | 0.5946401548110886 |
| 0.6382232303681336 | 0.7227083690647264 | 0.6086376356605641 |
| 0.6575522817546257 | 0.7786474683789208 | 0.5773355091901350 |
| 0.4919698256491927 | 0.6285871342208650 | 0.3786424699913269 |
| 0.4320132609964489 | 0.6642486864104526 | 0.3642784158876751 |
| 0.4520447314752047 | 0.7221915661764767 | 0.3320430457584535 |
| 0.5455939062515824 | 0.6646004475796160 | 0.6461012775767756 |
| 0.5824026705456761 | 0.7226548057829376 | 0.6551740895669694 |
| 0.6221472861506571 | 0.8365767097708955 | 0.5911935775229082 |
| 0.3863506443885072 | 0.8719829960727948 | 0.5454380712214048 |
| 0.3545575622127971 | 0.7783286991301921 | 0.5975409170839256 |
| 0.3645574445066943 | 0.8360102230212263 | 0.4295521265989067 |
| 0.4423439581727422 | 0.9060108615460224 | 0.5228369378900553 |
| 0.4755074055684148 | 0.7785995424129837 | 0.6733621733671739 |
| 0.4399801722888839 | 0.7226737847830762 | 0.6645114235625725 |
| 0.3756176156328336 | 0.6644565473057611 | 0.5881821667063108 |
| 0.3493634794313465 | 0.6642090992940338 | 0.5229189842627379 |
| 0.5040096460417658 | 0.9060599365709763 | 0.5614984487915465 |



|                    |                    |                    |
|--------------------|--------------------|--------------------|
| 0.5600460483620254 | 0.9064207875330013 | 0.5149783613479642 |
| 0.5325986352499258 | 0.9057040448591634 | 0.4475660342054582 |
| 0.4753687616576273 | 0.6646642555893435 | 0.6507948813973314 |
| 0.4353858534452826 | 0.6290453492889725 | 0.6038974004015286 |
| 0.3813505554957928 | 0.6281385964058899 | 0.4706147443392439 |
| 0.3912129065352445 | 0.8364700145107165 | 0.6069233909055994 |
| 0.3475379393343658 | 0.8359945761093782 | 0.4977891951845024 |
| 0.3782939967072565 | 0.7225546965806160 | 0.6258169934753254 |
| 0.4508249944189017 | 0.8365762864528535 | 0.6443393967279151 |
| 0.4599619246312940 | 0.9061110306284874 | 0.4522019492896874 |
| 0.4211659119178534 | 0.8721296805670563 | 0.4058062471333911 |
| 0.3619284859398491 | 0.7780128508532513 | 0.3918212417252391 |
| 0.3425827109424446 | 0.7220842022518639 | 0.4231167918397105 |
| 0.5081692398288666 | 0.8721554525278066 | 0.6218246815734644 |
| 0.5681346977561575 | 0.8364902347249554 | 0.6362099891482559 |
| 0.5481039777042511 | 0.7785486746943561 | 0.6684461885834665 |
| 0.4545592006151153 | 0.8361183336030464 | 0.3543687423471625 |
| 0.4177553744339306 | 0.7780599179324666 | 0.3452989397771802 |
| 0.3780218809721490 | 0.6641741890844415 | 0.4092749698656491 |
| 0.6138063307318761 | 0.6287151295362891 | 0.4550110598413966 |
| 0.6455369664783887 | 0.7224047381090983 | 0.4029352040982701 |
| 0.6355962641779841 | 0.6647075897613632 | 0.5708957739822011 |
| 0.5578173144399159 | 0.5946859742363131 | 0.4775985686486024 |
| 0.5246244152398917 | 0.7221403508131417 | 0.3271445839687104 |
| 0.5601389203509227 | 0.7780463484185346 | 0.3359814251204867 |
| 0.6245077124125091 | 0.8362768598692369 | 0.4122671910302743 |
| 0.6507430282967660 | 0.8365171663668532 | 0.4775307715692420 |
| 0.4961406404560265 | 0.5946766119979047 | 0.4389442853614085 |
| 0.4401066090788959 | 0.5943543151802969 | 0.4854649032821570 |
| 0.4675548515817596 | 0.5950465973487553 | 0.5528730720398372 |
| 0.5247617931674070 | 0.8360718712709101 | 0.3496606109190097 |
| 0.5647664421296668 | 0.8717040155241308 | 0.3965325893808752 |
| 0.6188155627808527 | 0.8726069182402439 | 0.5298443629796522 |

---

|                    |                    |                    |
|--------------------|--------------------|--------------------|
| 0.6727007978372938 | 0.7226498741787423 | 0.4704134201273079 |
| 0.6752317137132948 | 0.7786058498633537 | 0.5068724485136968 |
| 0.3274085930979425 | 0.7780784841474427 | 0.5300463542735726 |
| 0.3248702959424392 | 0.7221069023739588 | 0.4935730256164490 |
| 0.5001964067427238 | 0.0003604854682209 | 0.5000866912414780 |
| 0.5002050963708271 | 0.5003587679216396 | 0.5000792834833661 |
